# Supplementary material for: Grassland restoration impacts human-wildlife and social conflicts in the Chyulu Hills, Kenya
Source: Frontiers journal article supplement (doi:10.3389/fenvs.2024.1431316), 2025-02-18
Supplement: Data_Sheet_1.docx [file Data_Sheet_1.docx]

Supplementary Materials

Annex 1. Household survey used to assess human-wildlife conflicts and social conflicts in Chyulu Hills, Kenya.

Consent form

*[Enumerator greets the household member and asks whether the household head is available. In case household head is not available, the enumerator asks whether the spouse of household head is available].*

My name is_________________(enumerator name) working with Conservation International, the organization that, with Maasai Wilderness Conservation Trust and Big Life, is implementing the Chyulu Rangeland Restoration Program, which has the objective of restoring grassland in this area to improve livestock production and the livelihoods of pastoralists.

As part of a complementary project named “Restoring Nature and Peace threatened by Climate Change”, Conservation International is conducting surveys to gather perceptions on the existence, types and frequency of conflicts community members may face related to access to fodder and water for livestock and on the potential impacts of rangeland restoration. This information will be then used to understand how rangeland restoration may be helping communities, as well as to design, modify and improve additional restoration efforts in Chyulu Hills and in Kenya. The survey should take about an hour of your time to answer 40 questions.

Are you interested in helping us by participating in this survey? *[If the person says yes, please continue reading this information. If the person says no, please thank him/her for his/her time so far].*

Thank you for agreeing to participate. Participation is entirely voluntary, and you may stop talking at any time. If you feel uncomfortable regarding any question you do not have to answer it. If you want to stop the survey at any time, just please let me know and I can disregard your answers.

The information you share will be treated as confidential and your name will not be recorded. The results will be presented in such a way that the location of your home will not be identified.

If you now or later have any other questions, complaints or concerns about this assessment, or about the way I am conducting it, you can talk to Josephat Nyongesa jnyongesa[@conservation.org](mailto:vmcelhinny@conservation.org). If you have any questions regarding your rights as a research subject or if you have a grievance related to the research, you may contact CI’s Ethics Hotline at 503-748-0567 in Kenya.

Do you have any questions about the survey?

To be completed by the enumerator

**Statement of Consent**

☐ I have read the project information dated (________) to the household member as described in page 1 and gave the opportunity for the household member that will participate in the survey to ask questions.

☐ The household member has voluntarily consented to be a participant in this survey

________________________

Enumerator Signature Date

**Name of the enumerator: ___________________**

**County: Sub-county:**

**Interview Time : Start___________End_____________________**

**Household code:_______ (to be provided by project team)**

**Group ranch or area name:__________**

1. Loosikitok (Mbirikani)
2. Ilchalai/Olibili (Mbirikani)
3. Motikanju (Kuku B)
4. Kanzi (Kuku A)

**Gender of the respondent:_____________**

Male

Female

Other

To be asked to the participant

Demographics

1. **Do you consider yourself the household head or the spouse of the household head? ______**

Household head=1

Spouse of the household head=2

1. **How many years have you lived in this community? ______________**
2. <1 year
3. 1-5 years
4. 6-10 years
5. >10 years
6. **What is your age?___________**
7. 18-30
8. 31-40
9. 41-50
10. 51-60
11. 61-70
12. >70
13. **How many family members, including you and all children, live in your household?**

Men: _____ Women: _____

1. **What is you highest level of education achieved by you? ________**
2. Has never gone to School
3. Pre-Primary School
4. Primary School
5. Secondary School
6. Technical/Vocational Training
7. College/University

Livelihoods

**6a. In this season (August-now), what has been the most important source of income for your household?_______**

1. Animal Husbandry/Livestock – Pastoralism
2. Animal Husbandry/Livestock – Enclosure
3. Crop Cultivation – Agriculture
4. Business owner
5. Employee – Informal Sector
6. Employee – Formal Sector
7. Trade
8. Other_______________

**6b. In this season (August-now), what has been the second most important source of income for your household?** *[if the respondent answers the same for questions 6a and 6b, the enumerator can remind the respondent that it must be the second most important source of income after whatever she/he responded for question 6a. If there is no additional source of income, please list the answer as “none”]___________*

1. Animal Husbandry/Livestock – Pastoralism

2. Animal Husbandry/Livestock – Enclosure

3. Crop Cultivation – Agriculture

4. Business owner

5. Employee – Informal Sector

6. Employee – Formal Sector

7. Trade

8. Other: [list here]_______________

9. None

**7a. What type of livestock do you raise?**

- - Cattle
  - Sheep
  - Goats
  - Chickens
  - Bees
  - Donkeys
  - None of the Above
  - Other: [list here]__________

**7b. How many animals do you currently own?**

Cattle n. of animals: ______

Sheep n. of animals: ______

Goats n of animals: ______

Chickens n. of animals: ______

Bee hives n. of hives: ________

Donkeys n. of animals: ______

Other: __________ n of animals: _______

1. **During this season (August-now) where have you usually taken your livestock to pasture?**

- Tsavo
- Chyulu
- Iltilala
- Esampu
- Isinet
- Ilchalai
- Olchurrai
- Lopolosis
- Imbouti
- Nkatetema
- Olkeri
- Mukao
- Noombaluani
- I feed them at home
- Other

1. **During this season (August-now), what is the usual distance between your home and the area where you take your livestock to pasture in kilometers?_______**
2. **Have you grown any crops this season (August-now)?_______**
   1. Yes
   2. No

**11a. (if the answer is no, enumerator moves to question 12).**

**If yes, which crops are you growing this season (August-now)?**

- Maize
- Watermelon
- Green pepper
- Beans
- Leaf Vegetables (such as Kales, Spinach, Sukumawiki)
- Tomatoes
- Other vegetables e.g french beans, cucumber, capsicum, coriander, eggplant, carrots, okra etc
- Others: [list all here]_______________

**11b. Has your production been sufficient to:**

| **Crop** | **Production (kg/harvest)** |
| --- | --- |
| Maize | - Production has been insufficient to feed all members of my household - Production has been sufficient to feed all members of my household - Production has been sufficient to feed all members of my household and non-household members and/or sufficient to generate income for the household |
| Watermelon | - Production has been insufficient to feed all members of my household - Production has been sufficient to feed all members of my household - Production has been sufficient to feed all members of my household and non-household members and/or sufficient to generate income for the household |
| Green pepper | - Production has been insufficient to feed all members of my household - Production has been sufficient to feed all members of my household - Production has been sufficient to feed all members of my household and non-household members and/or sufficient to generate income for the household needs |
| Beans | - Production has been insufficient to feed all members of my household - Production has been sufficient to feed all members of my household - Production has been sufficient to feed all members of my household and non-household members and/or sufficient to generate income for the household |
| Leaf Vegetables (such as: kale, spinach, cabbage, etc) | - Production has been insufficient to feed all members of my household - Production has been sufficient to feed all members of my household - Production has been sufficient to feed all members of my household and non-household members and/or sufficient to generate income that is higher than household needs |
| Tomato: | - Production has been insufficient to feed all members of my household - Production has been sufficient to feed all members of my household - Production has been sufficient to feed all members of my household and non-household members and/or sufficient to generate income for the household |
| Other:____________ | - Production has been insufficient to feed all members of my household \ - Production has been sufficient to feed all members of my household - Production has been sufficient to feed all members of my household and non-household members and/or sufficient to generate income that is higher than household needs |
| Other:_____________ | - Production has been insufficient to feed all members of my household - Production has been sufficient to feed all members of my household - Production has been sufficient to feed all members of my household and non-household members and/or sufficient to generate income for the household |
| Other:________________ | - Production has been insufficient to feed all members of my household - Production has been sufficient to feed all members of my household - Production has been sufficient to feed all members of my household and non-household members and/or sufficient to generate income for the household |

Frequency of interactions with wildlife

**12.****During this season (August-now), has your livestock suffered from diseases that you believe were transmitted from wildlife?_______**

- - - 1. Yes
      2. No

**13.(if the answer is “no” or “I do not know”, enumerator moves to question 14).**

**If yes, from August-now, how many of your livestock were sick or died from diseases that you believe were transmitted from wildlife?**

Number of animals sick: _____

Number of animal deaths: ______

**14.During this season (August-now), have you or any household members experienced attacks by wildlife?____________**

- - - 1. Yes
      2. No

**15a. (if the answer is “no”, enumerator moves to question 16).**

**If yes, the attacks were from what type of wildlife?**

- Elephants
- Lions
- Hyena
- Buffalos
- Elands
- Leopards
- Giraffe
- Other species [list here]:_________________

**15b. In this season (August-now), how many people from your household, including you, experienced attacks by wildlife?___________**

**15c. How severe were injuries from the attacks by the wildlife? *[if “other species” are mentioned, please list the type of wildlife]*.**

| **Non-lethal attacks on you or household members by** | **N. of people attacked** | **Severity of injuries**  **(1=light, 2=moderate, 3=severe)** |
| --- | --- | --- |
| Elephants | ____people attacked |  |
| Lions | ____people attacked |  |
| Hyena | ____people attacked |  |
| Buffalos | ____people attacked |  |
| Elands | ____people attacked |  |
| Leopards | ____people attacked |  |
| Giraffe | ____people attacked |  |
| Other species: [list here]:________ | ____people attacked |  |

1. **During this season (August-now), how frequently have you or household members encountered wildlife in your property or communal land?__________**
2. Every day
3. Several times a week
4. Once a week
5. Once, twice or thrice in a month
6. Once, twice or thrice in this season
7. Never

**16a. During this season (August - now), has your household experienced any damage of property items caused by wildlife?**

- - - 1. Yes
      2. No

**(if the answer is “no”, enumerator moves to question 16e).**

**If yes, during this season (August-now), how frequently has your household experienced any destruction of property caused by conflict with wildlife?________________**

- - - 1. Rarely
      2. Frequently
      3. Very frequently

**16b. During this season (August-now) what property item was damaged?**

- water pipes
- grain stores
- houses
- fences
- water tanks
- trees
- boma (Kraaal)
- other [list here]: ________________________
- other [list here]: ________________________
- other [list here]: ________________________

**16c. How severe would you rate the damage caused? (1= light, 2 = moderate, 3 = severe)?**

| **If yes, No. times property items were damaged** | **Damage caused** | **Severity of damage (1= light, 2 = moderate, 3 = severe)?** |
| --- | --- | --- |
|  | - water pipes - grain stores - houses - fences - water tanks - trees - boma (Kraaal) - other_________ - other_________ - other_________ | ______  ______  ______  ______  ______  ______  ______  _______  ________  ________  _________ |

**16d. During this season (August-now), what do you believe were the 2 most common causes of damage to property items by wildlife?**

1. _____________________________________________________________________

2._____________________________________________________________________

**16e. During this season (August-now), has conflict with wildlife caused damages to the crops you grow?________________**

1. Yes
2. No

**16g. During this season (August-now), what was the perceived damage to your crop production caused by wildlife, based on total production?__________**

| 1. Most  2. About Half  3. Just a Few |
| --- |

**16h.   During this season (August-now) what do you believe were the 2 most important causes of crop destruction by wildlife?**

1. _____________________________________________________________________

2._____________________________________________________________________

**16i. During this season (August - now), has any of your livestock been killed by wildlife?________**

- - - 1. Yes
      2. No

**16j. (if the answer is “no”, enumerator moves to question 17).**

**If yes, how many of your livestock was killed by wildlife?__________**

**16k. During this season (-now) did you lose any of your livestock due to droughts?**

- - - 1. Yes
      2. No

**How many of your livestock did you lose due to droughts?**

**What was the total number of livestock you had at the time of those losses:**

**16l. If you have experienced Human-wildlife conflicts, did they increase, decrease or remain the same in the past 2 years?**

- - - 1. Increase
      2. Decrease
      3. Remain the same

Now we are going to talk about frequency and severity of conflicts with other members of the community

1. **During this season (August-now), has your household experienced any damage to property items caused by conflicts with people outside your household?**
2. Yes
3. No

**18a. (if the answer is “no”, enumerator moves to question 20).**

**If yes, how frequently has your household experienced any damages to property items by people outside your household?__________**

- - - 1. Rarely
      2. Frequently
      3. Very frequently

**18b. What property item was damaged?**

- water pipes
- grain stores
- houses
- fences
- water tanks
- trees
- boma (Kraaal)
- other [list here]: ________________________
- other [list here]: ________________________
- other [list here]: ________________________

**18c. How severe would you rate the damage caused? (1= light, 2 = moderate, 3 = severe)?**

| **If yes, No. times property items were damaged** | **Destruction caused** | **Severity of damage (1= light, 2 = moderate, 3 = severe)?** |
| --- | --- | --- |
|  | - water pipes - grain stores - houses - fences - water tanks - trees - bomas (Kraal) - other_________ - other_________ - other_________ | ______  ______  ______  ______  ______  ______  ______  _______  ______  ______ |

**19.During this season (August-now), what do you believe were the 2 most common causes of the conflict with other people/groups that resulted in damage to property items?**

1. _____________________________________________________________________

2._____________________________________________________________________

**20.During this season (August-now), has conflict with people outside your household resulted in the injury of any persons in your household?**

- - - 1. Yes
      2. No

**21a. (if the answer is “no”, enumerator moves to question 23).**

**If yes, how frequently has conflict with people outside your household resulted in the injury of any person/people in your household?**

1. Rarely

2. Frequently

3. Very frequently

**21b. During this season (August-now), how many people from your household were injured from conflicts with people outside your household?____**

**22. During this season (August-now), what do you believe were the 2 most common causes for the conflict with people outside your household that resulted in injury of any person in your household?**

1. _____________________________________________________________________

2._____________________________________________________________________

1. **During this season (August-now), has conflict with people outside your household resulted in the death of any persons in your household? _____**
   - - 1. Yes
       2. No
2. **What do you believe were the 2 most common causes of the conflict with people outside your household that resulted in the death of any persons in your household?**

1. _____________________________________________________________________

2._____________________________________________________________________

1. **During this season (August-now), has conflict with people outside your household affected your household’s livestock or crop production?**

Yes

No

**27a. (if the answer is “no”, enumerator moves to question 29).**

**If yes, during this season (August-now), how many times was your household’s livestock stollen or killed or were your crops damaged or stollen by people outside your household ?_________**

**27c. During this season (August-now), what was the perceived damage to crops or livestock caused by people outside your household based on total production?**

| **Impact on livestock or crops** | **If yes, number of times it has happened** | **Damage caused per time that the conflict occurred** | **Perceived damaged to livestock or crops based on total production (1=most, 2=about half, 3=just a few)** |
| --- | --- | --- | --- |
| Crop damaged by people outside the household |  | Leave blank | _________  _________  _________  _________  _________  _________ |
| Crop theft by people outside the household |  | Leave blank | _________  _________  _________  _________  _________  _________ |
| Livestock theft by people outside the household |  | ____ (number) of livestock stolen  ____ (number) of livestock stolen  ____ (number) of livestock stolen  ____ (number) of livestock stolen  ____ (number) of livestock stolen | _________  _________  _________  _________  _________  _________ |
| Livestock killed by people outside the household |  | ____ (number) of livestock killed  ____ (number) of livestock killed  ____ (number) of livestock killed  ____ (number) of livestock killed  ____ (number) of livestock killed | _________  _________  _________  _________  _________  _________ |

**28. What do you believe were the 2 most important causes for the conflict with people outside your household that resulted in livestock killing or crop damage?**

1. _____________________________________________________________________

2._____________________________________________________________________

**29.During this season (August-now), has conflict with people outside your household affected the productivity or health of your livestock? ________**

1. Yes
2. No

**30. (if the answer is “no”, enumerator moves to question 31).**

**If yes, we would like to know more details on the causes and impact. For the following causes of livestock productivity loss, how many times did conflicts with people outside your household affect your livestock productivity, what was the damage caused, and how severe would you rate the decrease in livestock productivity (1= low, 2 = moderate, 3 = high, 4=extremely high)?**

| **Impact on livestock productivity** | **If yes, number times it has happened** | **Perceived decrease in livestock productivity** |
| --- | --- | --- |
| 1. Livestock productivity decreased due to lost access to water or grazing resources through the imposition of physical barrier or boundary |  |  |
| 1. Livestock productivity decreased due to lost access to water or grazing resources because of fear of violence during livestock migration or movement |  |  |
| 1. Livestock lost/harmed because of greater competition for water or grazing resources due to restricted migration or movement of livestock |  |  |
| 1. Livestock productivity decreased due to other reason (please specify reason):________________________________________________________________________________ |  |  |

**31.During this season (August-now), has conflict with people outside the household impacted your household by weakening or damaging intercommunal or social relationships? ______**

1. Yes
2. No
3. I don’t know

**32a. (if the answer is “no” or “I do not know”, enumerator moves to question 33).**

**If yes, please specify (how has it impacted?)__________________________________________________________________________________________________________________________________________________**

**32b. Explain how your household is coping with the change:_______________________________________________________________________________________________________________________________________________________________________________________________________________________________________________**

**33. During this season (August-now), has conflict with people outside your household impacted your household through the loss of a longstanding economic relationships (I.e., someone you exchanged goods, services, or money with; someone who sold you things or purchased things from you , etc.)?**

1. Yes
2. No
3. I do not know

**34a.(if the answer is “no” or “I do not know”, enumerator moves to question 35).**

**If yes, please specify: ____________________________________________________________________________________________________________________________________________________________________**

**34b.Explain how your household is coping with the change:________________________________________________________________________________________________________________________________________________________________________________________________________________________________________________________**

**35. During this season (August-now), has conflict with people from outside your household made you feel insecure or unsafe?________________**

1. Yes
2. No

**35a. If you have experienced conflicts with people outside your household (in your community or beyond), did they increase, decrease or remain the same in the past 2 years?**

1. Increase
2. Decrease
3. Remained the same

36.**During this season (August-now), has conflict with people outside your household had any other impact on your household that we haven’t already asked about?**

1.Yes

2.No

***If yes*, please explain.**

_________________________________________________________________________________________________________________________________________________________________________________________________________________________________________________

**36a. Has your home area experienced a decrease, increase or remained the same on vegetation cover in the past 2 years?**

1. Increase
2. Decrease
3. Remained the same

Strategies to mitigate conflicts

**37.****During this season (August-now), have you or members of your household used any mitigation strategies to deal with or prevent conflicts with people outside your household? ________**

1. Yes
2. No

**38.(if the answer is “no”, enumerator moves to question 39).**

**If yes, during this season (August-now) which strategies have you or members of your household used to deal with or prevent conflicts with people outside your household?** [Allow respondent to list strategies and mark which ones to follow up about in subsequent questions. If they state a strategy that is not already in the list, please list it following “Other:___” at the end of the list.]

- 1. **For each strategy listed, please follow up and ask the following:**
     1. **How frequently did you use [strategy listed]? It’s ok if you don’t know.**
     2. **How effective was [strategy listed] in preventing or dealing with conflicts with people outside your household? Not effective, somewhat effective, or highly effective? [In the corresponding column, please mark based on the coding: 1 = not effective, 2 = somewhat effective, 3= highly effective.]**
  2. **Repeat i and ii for all the mitigation strategies originally mentioned by the respondent.**

| **Strategies to deal with or prevent conflicts with people outside your household** | **If yes, how frequently did you or members of your household do or use this strategy from August to now?**  **(1. Rarely, 2. Frequently 3. Very frequently)** | **How effective was the strategy in preventing or dealing conflicts with people outside your household?**  **(1 = not effective, 2 = somewhat effective, 3= highly effective)** |
| --- | --- | --- |
| - Through communal land tenure arrangements |  |  |
| - Through individual/household land tenure arrangements |  |  |
| - Hiring guards as deterrents |  |  |
| - Building/maintaining fencing |  |  |
| - Keeping property, including livestock, closer to home |  |  |
| - Changing movements/restricting mobility of livestock herd |  |  |
| - Changing our own movements/restricting our own mobility |  |  |
| - Engaging community leaders/elders |  |  |
| - Engaging traditional institutions |  |  |
| - Engaging law enforcement |  |  |
| - Engaging local NGO |  |  |
| - Obtaining or keeping weapon(s) |  |  |
| - Keeping guard dogs as deterrents |  |  |
| Others (please list):  ______________________________ |  |  |
| Others (please list):  ______________________________ |  |  |

**39. During this season (August-now), have you or members of your household used any mitigation strategies deal with or prevent conflicts with wildlife? __________**

1. Yes
2. No

**40.(if the answer is “no”, survey ends here).**

**If yes, during this season (August-now), which strategies have you or members of your household used to deal with or prevent conflicts caused by wildlife?** [Allow respondent to list mitigation strategies and mark which ones to follow up about in subsequent Qs. If they state a mitigation strategy that is not already in the list, please list it following “Other:_______” at the end of the list.]

- - - - 1. **For each strategy listed, please follow up and ask the following:**
    1. **How frequently did you or members of your household use [strategy listed]? It’s ok if you don’t know.**
    2. **How effective was [strategy listed] in dealing with or preventing conflicts with wildlife? Not effective, somewhat effective, or highly effective? [In the corresponding column, please mark based on the coding: 1 = not effective, 2 = somewhat effective, 3= highly effective.]**
  1. **Repeat i and ii for all the mitigation strategies originally mentioned by the respondent.**

| **Strategies to deal with or prevent conflicts with wildlife** | **If yes, how often did you or members of your household use this strategy from August to now?**  **(1. Rarely, 2. Frequently 3. Very frequently)** | **How effective was the strategy in dealing with or preventing conflicts with wildlife?**  **(1 = not effective, 2 = somewhat effective, 3= highly effective)** |
| --- | --- | --- |
| - Human guardians |  |  |
| - Livestock guarding dogs |  |  |
| - Boma/Kraal livestock at night |  |  |
| - Fix or install fences |  |  |
| - Chilli grease |  |  |
| - Security Light/Fire lightning at night |  |  |
| - Other:_____________ |  |  |

Enumerator thanks the respondent:

**Thank you so much for your participation. This is very much appreciated and thank you so much for your time.**

Table 1. Average number of types of human-wildlife conflicts per household, and proportion of households that experienced human-wildlife conflicts, in each period, and p-value.

| Variable | June-September 2022 | November-March 2023 | April-July 2023 | August-October 2023 | p-value |
| --- | --- | --- | --- | --- | --- |
| Mean proportion of people per household that experienced non-lethal attacks by wildlife | 0.042a | 0.10b | 0.055c | 0.099b | Kruskal-Wallis chi-squared = 48.316, df = 3, p-value = 1.824e-10 |
| Proportion of households that had experienced non-lethal attacks by wildlife | 0.10 | 0.30 | 0.22 | 0.28 | p-value = 1.973e-11 |
| Mean number of property items per household damaged by wildlife | 0.79a | 1.37b | 1.06c | 1.56d | Kruskal-Wallis chi-squared = 134.25, df = 3, p-value < 2.2e-16 |
| Proportion of households that experienced property items damaged by wildlife | 0.59 | 0.78 | 0.65 | 0.61 | p-value = 3.223e-08 |
| Proportion of households that experienced crop damages by wildlife | 0.68 | 0.84 | 0.69 | 0.74 | p-value = 0.006772 |
| Proportion of households that experienced livestock predation by wildlife | NA | 0.62 | 0.46 | 0.56 | p-value = 9.349e-05 |

Table 2. Average number of types of social conflicts per household, and proportion of households that experienced social conflicts, in each time period, and p-value.

| Variable | June-September 2022 | November-March 2023 | April-July 2023 | August-October 2023 | p-value |
| --- | --- | --- | --- | --- | --- |
| Mean number of property items per household damaged by people | 0.23a | 0.22a | 0.27a | 0.13b | Kruskal-Wallis chi-squared = 15.193, df = 3, p-value = 0.001659 |
| Proportion of households that have experienced property damage by people | 0.17 | 0.18 | 0.22 | 0.12 | p-value = 0.002782 |
| Proportion of households that have experienced people injured due to conflicts | 0.04 | 0.04 | 0.04 | 0.0075 | p-value = 0.001729; |
| Mean number of times a household experienced crop damage by people |  | 2.52a | 1.68b | 1.61b | Kruskal-Wallis chi-squared = 11.603, df = 2, p-value = 0.003023 |
| Proportion of households that have experienced crop damage by people | 0.14 | 0.28 | 0.29 | 0.2 | NS |
| Mean number of times a household experienced crops stolen by people |  | 2.39 | 2.07 | 2 | NS |
| Proportion of households that have experienced crops stolen by people | 0.05 | 0.17 | 0.18 | 0.04 | p-value = 0.001542; X-squared = 14.038, df = 3, p-value = 0.002854 |
| Mean number of times a household experienced livestock been stolen by people |  | 2.56 | 1.29 | 1 | Kruskal-Wallis chi-squared = 3.4724, df = 2, p-value = 0.1762 |
| Mean number of times a household experienced livestock been killed by people |  | 1.42a | 1.17a | 0.5b | Kruskal-Wallis chi-squared = 7.7864, df = 2, p-value = 0.02038 |
| Proportion of households that have experienced livestock been killed by other people | 0.03 | 0.03 | 0.04 | 0.008 | p-value = 0.008176, |
| Proportion of households that have experienced livestock and/or crops impacts | 0.07 | 0.17 | 0.13 | 0.05 | p-value = 4.948e-07 |
| Proportion of households that have experienced impacts on productivity and health of livestock | 0.13 | 0.2 | 0.11 | 0.17 | p-value = 0.001672 |
| Mean number of times a household experienced livestock productivity decreases due to a physical barrier | 3.31a | 2.17b | 1.83b | 1.48c | Kruskal-Wallis chi-squared = 28.913, df = 3, p-value = 2.336e-06 |
| Proportion of households that experienced livestock productivity decreases due to a physical barrier | 0.13 | 0.15 | 0.11 | 0.14 | NS |
| Mean number of times a household experienced livestock productivity decreases due to fear | 2.86a | 2.27a | 1.67b | 1.41c | Kruskal-Wallis chi-squared = 37.295, df = 3, p-value = 3.985e-08 |
| Proportion of households that experienced livestock productivity decreases due to fear | 0.12 | 0.17 | 0.10 | 0.16 | p-value = 0.02127; X-squared = 9.5667, df = 3, p-value = 0.02263 |
| Mean number of times a household experienced livestock productivity decreases due to restricted migration | 3.55a | 2.11b | 1.54b,c | 1.5c | Kruskal-Wallis chi-squared = 34.411, df = 3, p-value = 1.622e-07 |
| Proportion of households that experienced livestock productivity decreases due to restricted migration | 0.12 | 0.17 | 0.11 | 0.13 | NS |

Table 3. Average number of types of human-wildlife conflicts per household, and proportion of households that experienced human-wildlife conflicts, in each time period, in households led by women and men, and p-value.

| Variable | Households led by women | Households led by men | p-value |
| --- | --- | --- | --- |
| Mean proportion of people per household that experienced non-lethal attacks by wildlife | 0.07 | 0.07 | NS |
| Proportion of households that had experienced non-lethal attacks by wildlife | 0.22 | 0.23 | NS |
| Mean number of property items per household damaged by wildlife | 1.08 | 1.18 | NS |
| Proportion of households that experienced property items damaged by wildlife | 0.67 | 0.66 | NS |
| Proportion of households that experienced crop damage by wildlife | 0.88 | 0.74 | NS |
| Proportion of households that experienced livestock predation by wildlife | 0.43 | 0.56 | p-value = 0.004284 |

Table 4. Average number of types of social conflicts per household, and proportion of households that experienced social conflicts, in households led by women and men, and p-value.

| Variable | Households led by women | Households led by men | p-value |
| --- | --- | --- | --- |
| Mean number of property items per household damaged by people | 0.32 | 0.189 | Kruskal-Wallis chi-squared = 16.786, df = 1, p-value = 4.183e-05 |
| Proportion of households that have experienced property damage by people | 0.27 | 0.16 | p-value = 0.0001072 |
| Proportion of households that have experienced people injured due to conflicts | 0.22 | 0.23 | NS |
| Mean number of times a household experienced crop damage by people | 2.06 | 2 | NS |
| Proportion of households that experienced crop damage by people | 0.4 | 0.29 | p-value = 0.02899 |
| Mean number of times a household experienced crops stolen by people | 2.66 | 2.14 | NS |
| Proportion of households that have experienced crops stolen by people | 0.15 | 0.13 | NS |
| Mean number of times a household experienced livestock been stolen by people | 1.5 | 1.8 | NS |
| Proportion of households that experienced livestock being stolen by people | 0.02 | 0.03 | NS |
| Mean number of times a household experienced livestock been killed by people | 2.25 | 1.03 | Kruskal-Wallis chi-squared = 7.7829, df = 1, p-value = 0.005274 |
| Proportion of households that have experienced livestock been killing by other people | 0.04 | 0.03 | NS |
| Proportion of households that have experienced livestock and/or crops impacts | 0.14 | 0.1 | NS |
| Proportion of households that have experienced impacts on productivity and health of livestock | 0.21 | 0.14 | p-value = 0.02283 |
| Mean number of times a household experienced livestock productivity decreases due to a physical barrier | 2.18 | 2.17 | NS |
| Proportion of households that have experienced livestock productivity decreases due to a physical barrier | 0.18 | 0.12 | NS |
| Mean number of times a household experienced livestock productivity decreases due to fear of violence | 2.0 | 2.05 | NS |
| Proportion of households that have experienced livestock productivity decreases due to fear of violence | 0.2 | 0.15 | p-value = 0.009513 |
| Mean number of times a household experienced livestock productivity decreases due to restricted migration | 2.27 | 2.14 | NS |
| Proportion of households that have experienced livestock productivity decreases due to restricted migration | 0.25 | 0.12 | p-value = 0.007679 |
